# Supplementary material for: Value of repeated imaging in patients with a stroke who are transferred for endovascular treatment
Source: PubMed Central journal article supplement (PMC8784993; doi:10.1136/neurintsurg-2020-017050), 2021-03-08
Supplement: neurintsurg-2020-017050supp001.pdf [file neurintsurg-2020-017050supp001.pdf]

## SUPPLEMENTAL MATERIAL

**Tables****Table I. Clinical outcomes**

|                                                                    | <b>Repeated imaging, n=165</b> | <b>No repeated imaging, n=386</b> | <b>Unadjusted OR (95% CI)</b>   | <b>Adjusted OR<sup>‡</sup> (95% CI)</b> |
|--------------------------------------------------------------------|--------------------------------|-----------------------------------|---------------------------------|-----------------------------------------|
| <b>Functional independence (90 day mRS 0-2) –</b><br>no./total (%) | 45/95 (47%)                    | 113/279 (41%)                     | 1.57 (1.01 – 2.44)              | 1.10 (0.61 – 1.99)                      |
| <b>mRS score at 90 days* –</b><br>median (IQR)                     | 3 (1-6)                        | 3 (1-6)                           | 1.55 <sup>†</sup> (0.95 – 2.54) | 1.14 <sup>†</sup> (0.70 – 1.88)         |
| <b>Symptomatic ICH –</b><br>no./total (%)                          | 2/164 (1%)                     | 30/383 (8%)                       | 0.15 (0.03 – 0.62)              | 0.29 (0.07 – 1.31)                      |
| <b>Mortality at 90 days –</b><br>no./total (%)                     | 31/95 (33%)                    | 78/279 (28%)                      | 0.94 (0.61 – 1.46)              | 0.82 (0.45 – 1.50)                      |

CI = confidence interval; ICH = intracranial hemorrhage; IQR = interquartile range; mRS = modified Rankin scale; OR = odds ratio.

Number of missing values: \*177.

<sup>†</sup>Odds of 1-point shift towards a favorable outcome on the mRS for the repeated imaging group.

<sup>‡</sup>All analyses were adjusted for: age, blood pressure, previous stroke, NIHSS score, location of occlusion on first CTA, time of presentation (within or outside office hours), treatment with IVT, treatment with EVT.

**Table II. Reasons for refraining from EVT**

|                                                                          | <b>Repeated imaging (n=90)</b> | <b>No repeated imaging (n=60)</b> | <b>p value</b> |
|--------------------------------------------------------------------------|--------------------------------|-----------------------------------|----------------|
| Reason for refraining from EVT                                           |                                |                                   | <0.01          |
| Clinical characteristics – no./total (%)                                 | 21/90 (23%)                    | 37/60 (62%)                       |                |
| Combination of clinical and radiological characteristics – no./total (%) | 6 <sup>*</sup> /90 (7%)        | 9/60 (15%)                        |                |
| Radiological characteristics – no./total (%)                             | 63 <sup>†</sup> /90 (70%)      | 13/60 (22%)                       |                |
| LVO resolved                                                             | 55/90 (61%)                    | 0/60 (0%)                         |                |
| No LVO on PSC imaging <sup>‡</sup>                                       | 0/90 (0%)                      | 10/60 (17%)                       |                |
| Unfavorable imaging characteristics <sup>§</sup>                         | 3/90 (3%)                      | 2/60 (3%)                         |                |
| EVT not technically feasible                                             | 3/90 (3%)                      | 1/60 (2%)                         |                |
| Other                                                                    | 2/90 (2%)                      | 1/60 (2%)                         |                |

ASPECTS = Alberta stroke program early CT score; EVT = endovascular treatment; LVO = large vessel occlusion; no. = number; PSC = primary stroke center.

\*In 3/6 patients, repeated imaging contributed to the decision to refrain from EVT; in the other 3/6 patients, the imaging factors contributing to the decision to refrain from EVT were (also) visible on PSC imaging.

†In 58/63 patients, repeated imaging contributed to the decision to refrain from EVT; in the other 5/63 patients, the imaging factors contributing to the decision to refrain from EVT were (also) visible on PSC imaging.

‡Upon reassessment by the neuro-interventional radiologist at the CSC

§Low ASPECTS, poor collateral status and/or unfavorable CT perfusion characteristics.

**Figures**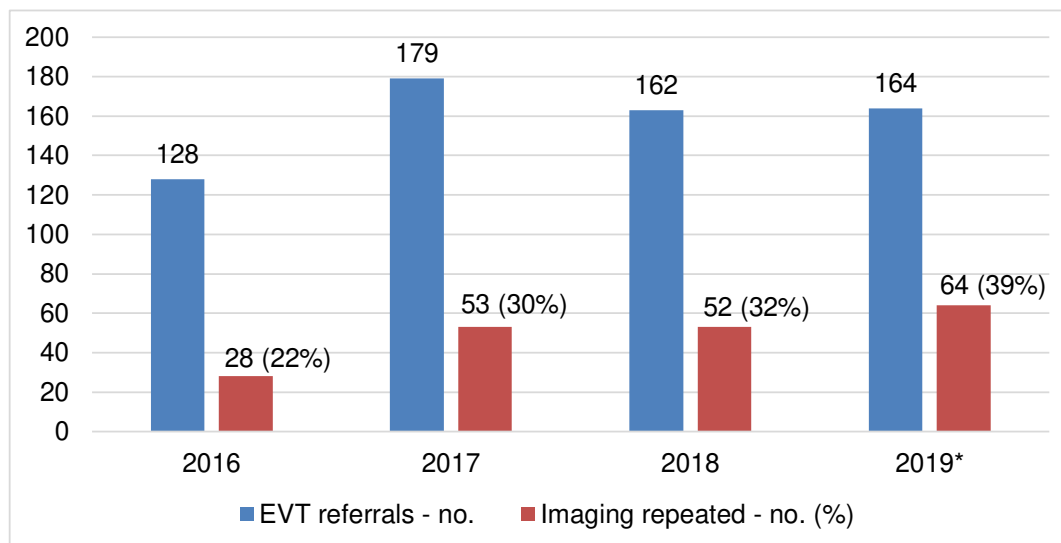

**Figure 2. Referrals for EVT per year during the study period.** Number of referrals (blue) and number and percentage of patients with repeated imaging (red) are reported for our hospital during the study period (January 2016 – June 2019). \*For 2019, data were extrapolated for the remainder of the year. EVT = endovascular treatment; no. = number.

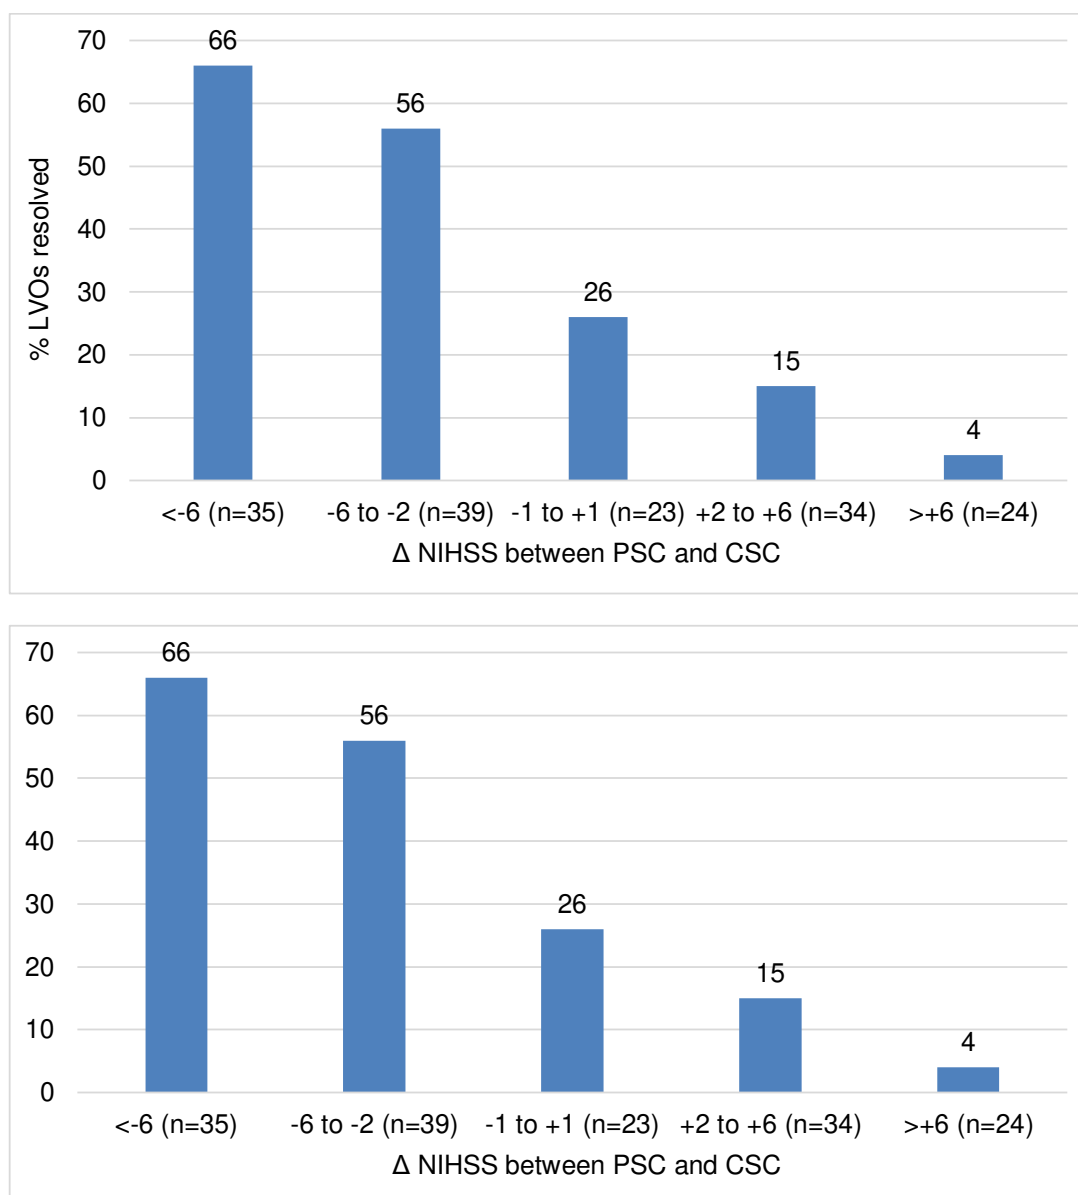

**Figure 3. Percentage of resolved LVOs per  $\Delta$  NIHSS sub group.** The percentage of LVOs that were resolved on repeated CTA related to the change in NIHSS score between PSC and CSC. A negative  $\Delta$  NIHSS value signifies clinical improvement; a positive value means clinical deterioration. The lower the  $\Delta$  NIHSS, the higher the percentage of patients with a resolved LVO on repeated imaging ( $p < 0.01$ ). CSC = comprehensive stroke center; CTA = computed tomography angiography; LVO = large vessel occlusion; NIHSS = National Institutes of Health Stroke Scale; PSC = primary stroke center.
